# Supplementary material for: The Dystonia Coalition: A Multicenter Network for Clinical and Translational Studies
Source: PubMed Central journal article supplement (PMC8060489; doi:10.3389/fneur.2021.660909), 2021-04-08
Supplement: Table_1.pdf [file Table_1.pdf]

## Supplementary 1. Dystonia Coalition Sites

| NO | NAME OF SITE                                                            | PROPOSED STATUS           |
|----|-------------------------------------------------------------------------|---------------------------|
| 1  | <b>Asan Medical Center, Seoul, South Korea</b>                          | Recruiting Site           |
| 2  | Baylor College of Medicine, Houston, TX                                 | Recruiting Site           |
| 3  | Beth Israel Deaconess Medical Center, Boston, MA                        | Recruiting Site           |
| 4  | Beth Israel Medical Center (Mount Sinai), New York, NY                  | Recruiting Site           |
| 5  | Booth Gardner Parkinson's Care Center, Kirkland, WA                     | Closed                    |
| 6  | Case Western Reserve Univ, Cleveland, OH                                | Recruiting Site           |
| 7  | <b>Children's Hospital Univ Medical Center, Montreal, Canada</b>        | Affiliate Site            |
| 8  | Duke University Medical Center, Durham, NC                              | Recruiting Site           |
| 9  | Emory Univ, Atlanta, GA                                                 | Organizing Center         |
|    |                                                                         | Recruiting Site           |
| 10 | Feinstein Inst, NY                                                      | Closed-PI moved           |
| 11 | Hadassah U, Israel                                                      | Affiliate Site            |
| 12 | <b>Govind Ballabh Pant Institute, Delhi, India</b>                      | Potential Recruiting Site |
| 13 | Henry Ford Health System, Detroit, MI                                   | Recruiting Site           |
| 14 | James Madison Univ, VA                                                  | Closed-PI retired         |
| 15 | Johns Hopkins Univ, Baltimore, MD                                       | Recruiting Site           |
| 16 | Lahey Clinic, Burlington, MA                                            | Recruiting Site           |
| 17 | Mayo Clinic, Phoenix, AZ                                                | Affiliate Site            |
| 18 | Medical College of Wisconsin, Madison, WI                               | Closed-PI moved           |
| 19 | Methodist Hospital Research Institute, Houston, TX                      | Recruiting Site           |
| 20 | Mount Sinai Medical Center, New York, NY                                | Closed-PI moved           |
| 21 | National Institute of Neurological Disorders and Stroke, Bethesda, MD   | Affiliate Site            |
| 22 | Parkinson's Movements Disorders Center of Maryland, Elkridge, MD        | Recruiting Site           |
| 23 | Parkinson's & Movements Disorders Institute (PMDI), Fountain Valley, CA | Affiliate Site            |
| 24 | Rush Univ, Chicago, IL                                                  | Recruiting Site           |
| 25 | <b>Salpetriere Hospital, Paris, France</b>                              | Recruiting Site           |
| 26 | Sanford Health, Fargo, ND                                               | Closed-PI moved           |
| 27 | <b>Seoul National Univ Hospital, Seoul, South Korea</b>                 | Recruiting Site           |
| 28 | <b>Toronto Western Hospital, Toronto, Canada</b>                        | Recruiting Site           |
| 29 | <b>Univ College London, London, UK</b>                                  | Recruiting Site           |
| 30 | Univ Alabama, Birmingham, AB                                            | Recruiting Site           |
| 31 | <b>Univ Alberta, Edmonton, Canada</b>                                   | Affiliate Site            |
| 32 | <b>Univ Bari, Bari, Italy</b>                                           | Closed-PI moved           |
| 33 | <b>Univ Cagliari, Cagliari, Italy</b>                                   | Recruiting Site           |
| 34 | <b>Univ Calgary, Alberta, Canada</b>                                    | Recruiting Site           |
| 35 | Univ Chicago, Chicago, IL                                               | Affiliate Site            |

|    |                                             |                 |
|----|---------------------------------------------|-----------------|
| 36 | Univ Cincinnati, Cincinnati, OH             | Recruiting Site |
| 37 | Univ Colorado, Denver, CO                   | Recruiting Site |
| 38 | Univ Florida, Gainesville, FL               | Recruiting Site |
| 39 | Univ Iowa, Iowa City, IA                    | Recruiting Site |
| 40 | <b>Univ Luebeck, Luebeck, Germany</b>       | Recruiting Site |
| 41 | Univ Maryland, Baltimore, MD                | Recruiting Site |
| 42 | U Minnesota                                 | Closed-PI moved |
| 43 | Univ New Mexico, Albuquerque NM             | Project Site    |
|    |                                             | Recruiting Site |
| 44 | Univ Pennsylvania, Philadelphia, PA         | Recruiting Site |
| 45 | Univ Rochester, Rochester, NY               | Recruiting Site |
| 46 | <b>Univ Rome, Rome, Italy</b>               | Recruiting Site |
| 47 | Univ Tennessee, Memphis, TN                 | Closed-PI moved |
| 48 | Univ Texas, Houston, TX                     | Closed-PI moved |
| 49 | Univ CA San Diego, San Diego, CA            | Project Site    |
| 50 | Univ Texas Southwestern, Dallas, TX         | Closed-PI moved |
| 51 | U Wisconsin, Madison                        | Affiliate Site  |
| 52 | Veracity Neuroscience LLC, Memphis TN       | Recruiting Site |
| 53 | Virginia Commonwealth Univ, Richmond, VA    | Recruiting Site |
| 54 | Wake Forest Univ, Winston Salem, NC         | Closed-PI moved |
| 55 | Washington Univ in St. Louis, St. Louis, MO | Project Site    |
|    |                                             | Recruiting Site |
| 56 | <b>Westmead Hospital, Sydney, Australia</b> | Recruiting Site |
